# Supplementary material for: Genetic Crossovers Are Predicted Accurately by the Computed Human Recombination Map
Source: PLoS Genet. 2010 Jan 29;6(1):e1000831. doi: 10.1371/journal.pgen.1000831 (PMC2813264; doi:10.1371/journal.pgen.1000831)
Supplement: Table S3 — Percentages of genetic and physical map found inside hotspots for each of the four population samples. (0.02 MB XLS) [file pgen.1000831.s020.xls]

## Sheet: Table3
	Hotspot definition	Number of hotspots	Genetic map coverage	Physical map coverage
	CEU	45872	0.769666	0.104502
	YRI	61920	0.717003	0.155301
	CHB	48493	0.789682	0.106994
	JPT	45863	0.782062	0.101456
